# Supplementary material for: Time- and memory-efficient genome assembly with Raven
Source: Springer Nature journal article supplement (doi:10.1038/s43588-021-00073-4), 2021-05-20
Supplement: 43588_2021_73_MOESM1_ESM.pdf [file 43588_2021_73_MOESM1_ESM.pdf]

**Supplementary information**

---

**Time- and memory-efficient genome assembly with Raven**

---

In the format provided by the authors and unedited

# Time and memory efficient genome assembly with Raven

Robert Vaser<sup>1,2</sup> and Mile Šikić<sup>1,2,\*</sup>

<sup>1</sup> Laboratory for Bioinformatics and Computational Biology, University of Zagreb, Faculty of Electrical Engineering and Computing, Zagreb, Croatia

<sup>2</sup> Laboratory of AI in Genomics, Genome Institute of Singapore, A\*STAR, Singapore

## Supplementary information

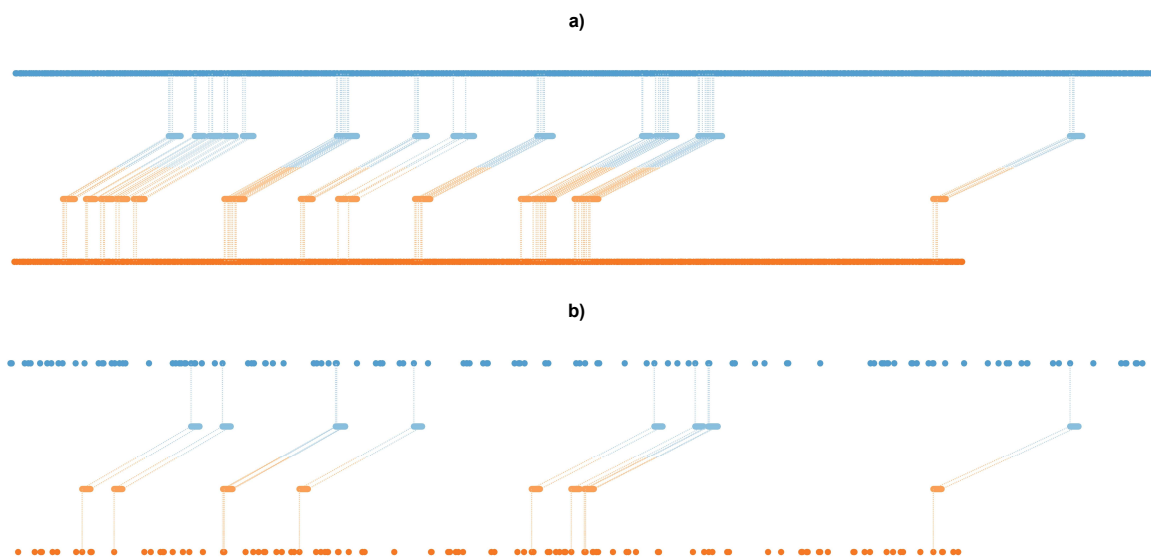

**Supplementary Figure 1. Overlap between two erroneous reads based on minimizer matches.** Raven uses the minimap algorithm to find pairwise overlaps, in which lexicography smallest k-mers in sliding windows (minimizers) of both reads are collected (blue and orange) and a linear chain of matches is found. a) While collecting all minimizers from a small sliding window ensures the retrieval of most overlaps between similar reads, b) a decent amount of overlaps can be retained by picking only a portion of the smallest minimizers. Shrinking the minimizer search space, without any other modifications, greatly accelerates the algorithm, and justifies the impact on sensitivity for containment removal and pile-o-gram creation.

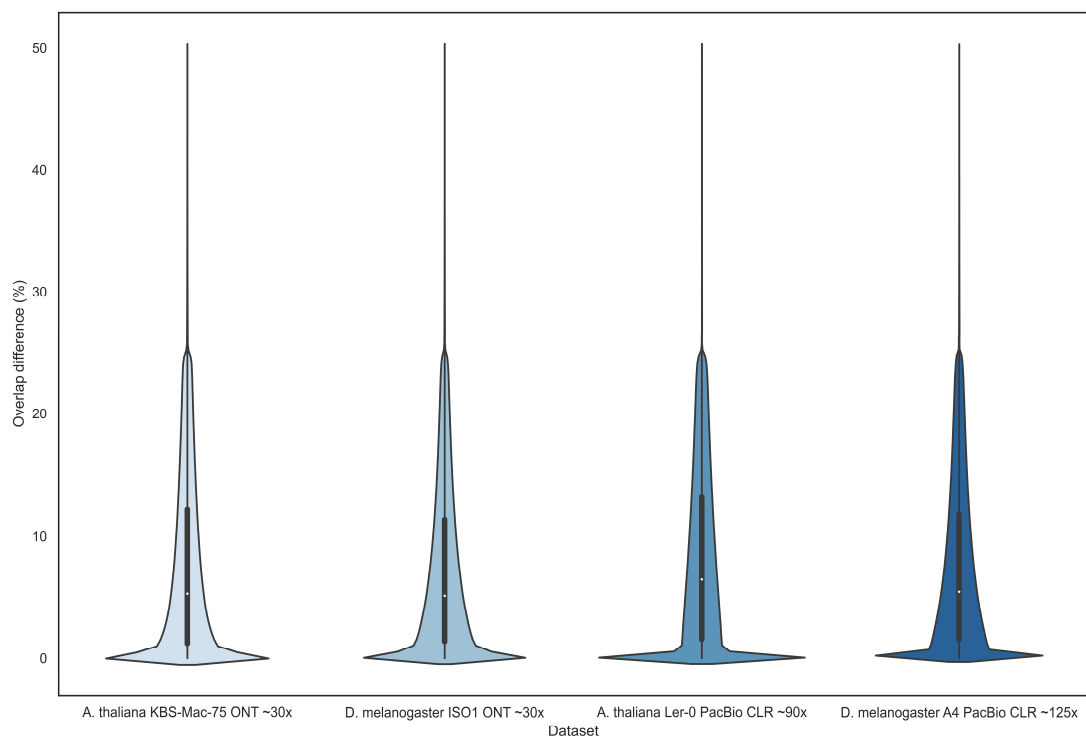

**Supplementary Figure 2. Overlap difference distributions when employing the MinHash paradigm on top of minimizers.** Raven reduces the number of minimizers used in the minimap algorithm by choosing only a portion of smallest values per read, which affects the beginning and ending position of pairwise overlaps between reads but enables faster containment removal with a small sensitivity degradation. Depicted values represent the absolute difference between old and new coordinates divided by the old overlap length (overlaps which cover less than 75% of the old region on either of the reads are discarded).

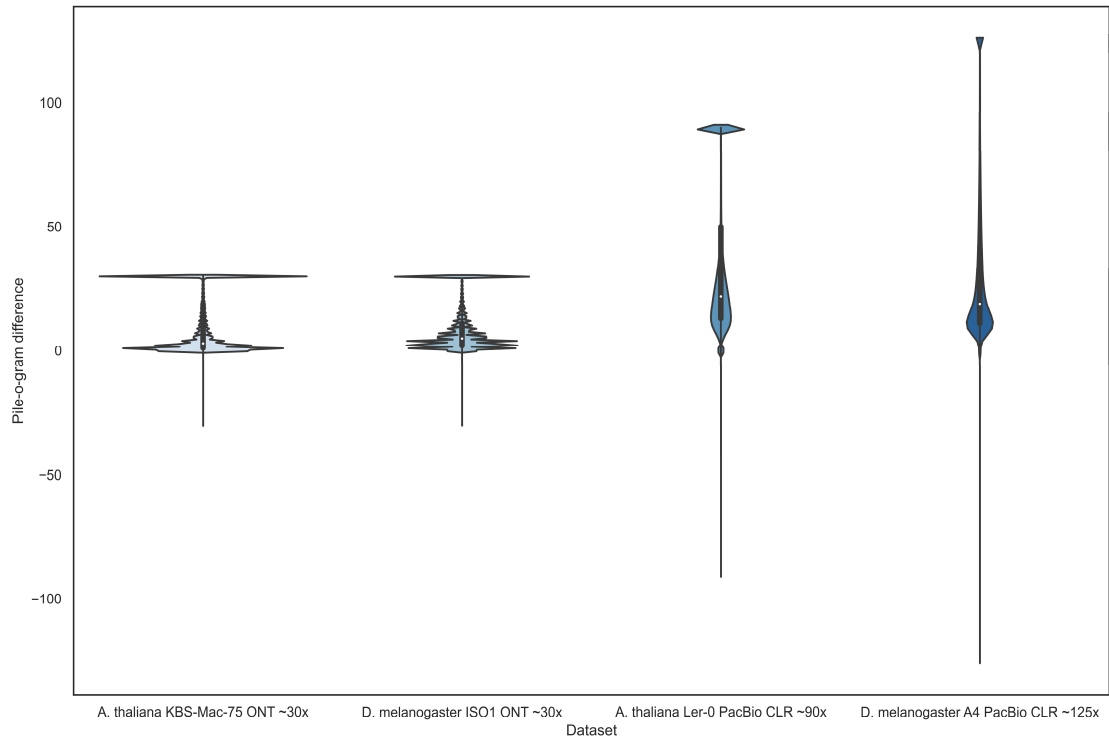

**Supplementary Figure 3. Pile-o-gram difference distribution when employing the MinHash paradigm on top of minimizers.** Raven reduces the number of minimizers used in the minimap algorithm by choosing only a portion of smallest values per read, which affects per-base coverage in pile-o-grams, but it is negligible for chimeric and repeat annotations. Depicted values represent per-base differences between old and new pile-o-grams, which are saturated to the sequencing depth in absolute value (the biggest differences in coverage are in repetitive regions due to different minimizer sampling).

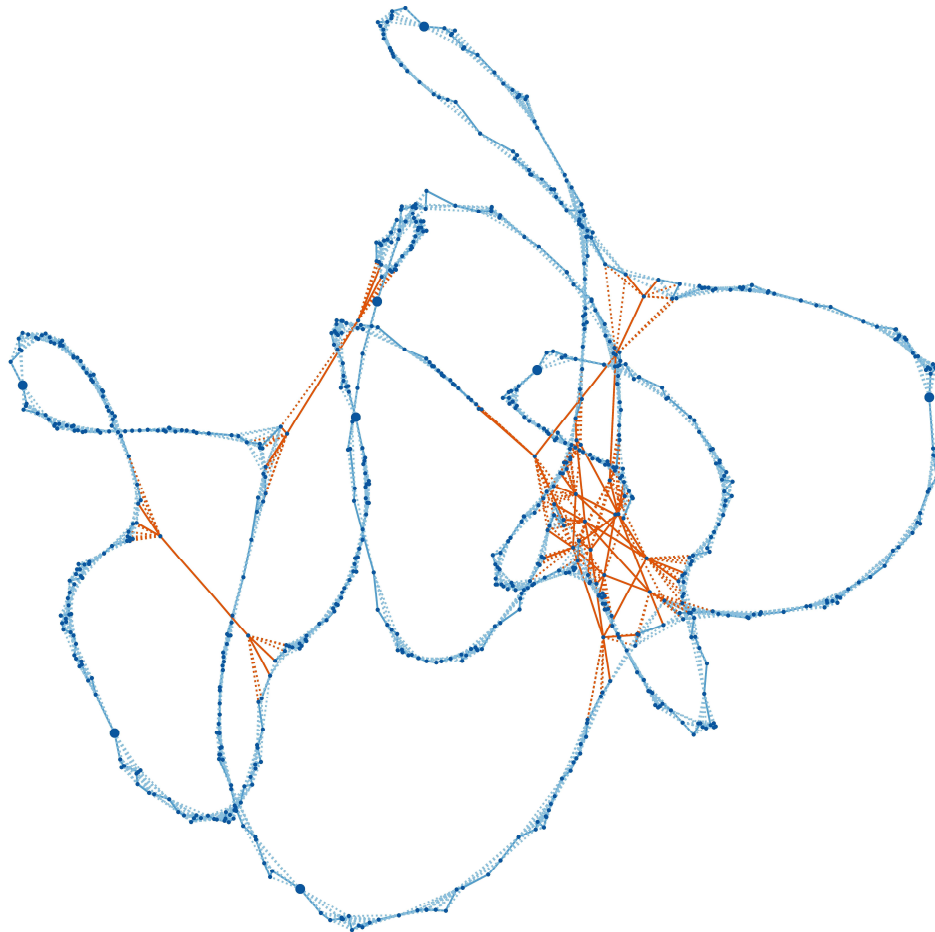

**Supplementary Figure 4. Bacterial assembly graph constructed without read pre-processing and drawn with the force-directed placement algorithm.** The graph simplification method based on vertex distances in two-dimensional Euclidean system underperforms when there are many repeat induced edges (orange) which connect distant genomic regions. Compared to Figure 1, overlap removal based on repeat annotations is skipped, which yields a more tangled graph at the end of the layout phase. Although, the simplification method is still able to correctly resolve all false connections for this case, but in a total of two iterations. Number of edges removed constitutes a small portion of edges in the assembly graph and depends on many intertwined factors (for *A. thaliana* and *D. melanogaster* datasets this value ranges between 1% and 11% with respect to number of remaining edges at the end of the layout phase). To fully utilize this method, read pre-processing should be applied beforehand.

**Supplementary Table 1. Assembly cost estimates.** Values with an asterisk were found in publications of corresponding assemblers, while values with a tilde are approximations when more threads are invoked. Canu assemblies were omitted due to long running times (according to (Shafin et al. 2020), its estimate cost is around \$19000 for all three ONT datasets).

| Dataset                                         | Assembler | Number of threads | Real Time (h) | Memory (Gb) | AWS instance | AWS cost / hour (\$) | AWS cost (\$) |
|-------------------------------------------------|-----------|-------------------|---------------|-------------|--------------|----------------------|---------------|
| <i>H. sapiens</i><br>CHM13<br>ONT ~130x         | Raven     | 48                | 123.12        | 251         | m5a.16xlarge | 2.75                 | ~253.94       |
|                                                 | Flye      | 48                | 141.78        | 873         | x1.16xlarge  | 6.67                 | ~709.25       |
|                                                 | Shasta    | 128*              | 5.28*         |             | x1.32xlarge  | 13.34                | 70.43         |
|                                                 | Wtdbg2    | 48                | 128.58        | 423         | r5a.16xlarge | 3.62                 | ~349.09       |
| <i>H. sapiens</i><br>HG002<br>ONT ~60x          | Raven     | 64                | 25.21         | 105         | c5a.16xlarge | 2.46                 | 62.02         |
|                                                 | Flye      | 64                | 49.86         | 951         | x1.16xlarge  | 6.67                 | 332.57        |
|                                                 | Shasta    | 64                | 3.09          | 771         | x1.16xlarge  | 6.67                 | 20.61         |
|                                                 | Wtdbg2    | 64                | 36.59         | 352         | r5a.16xlarge | 3.62                 | 132.46        |
| <i>H. sapiens</i><br>HG00733<br>ONT ~80x        | Raven     | 64                | 26.88         | 131         | m5a.16xlarge | 2.75                 | 73.92         |
|                                                 | Flye      | 64                | 57.14         | 546         | x1.16xlarge  | 6.67                 | 381.12        |
|                                                 | Shasta    | 64                | 2.83          | 870         | x1.16xlarge  | 6.67                 | 18.88         |
|                                                 | Wtdbg2    | 64                | 31.46         | 345         | r5a.16xlarge | 3.62                 | 113.89        |
| <i>H. sapiens</i><br>CHM13<br>PacBio CLR ~50x   | Raven     | 64                | 10.41         | 98          | c5a.16xlarge | 2.46                 | 25.61         |
|                                                 | Flye      | 64                | 35.29         | 407         | r5a.16xlarge | 3.62                 | 127.75        |
|                                                 | Shasta    | 64                | 1.54          | 547         | x1.16xlarge  | 6.67                 | 10.27         |
|                                                 | Wtdbg2    | 64                | 8.06          | 180         | m5a.16xlarge | 2.75                 | 24.64         |
| <i>H. sapiens</i><br>HG002<br>PacBio CLR ~80x   | Raven     | 64                | 23.78         | 129         | m5a.16xlarge | 2.75                 | 65.40         |
|                                                 | Flye      | 64                | 63.50         | 562         | x1.16xlarge  | 6.67                 | 423.55        |
|                                                 | Shasta    | 64                | 1.50          | 567         | x1.16xlarge  | 6.67                 | 10.01         |
|                                                 | Wtdbg2    | 64                | 9.29          | 207         | m5a.16xlarge | 2.75                 | 25.55         |
| <i>H. sapiens</i><br>HG00733<br>PacBio CLR ~95x | Raven     | 64                | 30.92         | 138         | m5a.16xlarge | 2.75                 | 85.03         |
|                                                 | Flye      | 64                | 110.94        | 663         | x1.16xlarge  | 6.67                 | 800.00        |
|                                                 | Shasta    | 48                | 1.28          | 1012        | x1.32xlarge  | 13.34                | ~6.40         |
|                                                 | Wtdbg2    | 64                | 25.12         | 340         | r5a.16xlarge | 3.62                 | 90.93         |
| <i>H. sapiens</i><br>PacBio HiFi ~35x           | hifiasm   | 48*               | 9*            | 150*        | m5a.12xlarge | 2.06                 | 18.54         |

**Supplementary Table 2. Evaluation of long-read assemblers on older sequencing datasets.** Values in columns that are missing CPU time and memory were obtained with assemblies from other publications. Canu assembly of dataset NA12878 was polished with short accurate reads and is excluded from accuracy comparison. Ra was not run on the NA12878 dataset due to its complexity on larger genomes. NG50 metric is defined as the length of the contig which coupled with longer contigs covers 50% of the reference genome. NGA50 is calculated the same way but on top of alignments between contigs and the reference. Quality value denotes the Phred base error rate of the assembly obtained by comparing k-mers between short accurate reads and the assembly. Multi-copy genes are those that occur multiple times both in the reference and the assembly. 99.5% of bases of a BAC need to be present in the assembly for it to be resolved. Bolded values represent the best metric scores.

| Dataset                                        | Metric                | Raven     | Canu        | Flye         | miniasm      | Ra          | Shasta     | Wtdbg2     |
|------------------------------------------------|-----------------------|-----------|-------------|--------------|--------------|-------------|------------|------------|
| <i>A. thaliana</i><br>KBS-Mac-74<br>ONT ~30x   | Genome fraction (%)   | 99.28     | 95.39       | <b>99.88</b> | 99.51        | 99.74       | 76.32      | 97.50      |
|                                                | No. of contigs        | <b>25</b> | 448         | 118          | 62           | 57          | 1382       | 353        |
|                                                | NG50 (Mb)             | 11.1      | 2.6         | <b>13.3</b>  | 11.2         | 7.4         | 0.3        | 9.8        |
|                                                | NGA50 (Mb)            | 5.6       | 2.2         | <b>9.2</b>   | 7.0          | 5.7         | 0.3        | 3.1        |
|                                                | NGA75 (Mb)            | 3.3       | 0.4         | <b>4.9</b>   | 3.3          | 2.5         | -          | 1.0        |
|                                                | No. of misassemblies  | 261       | 368         | 653          | 256          | 420         | <b>41</b>  | 500        |
|                                                | Mismatch fraction (%) | 0.30      | <b>0.16</b> | 0.30         | 0.18         | 0.33        | 0.51       | 0.36       |
|                                                | Indel fraction (%)    | 1.73      | 2.25        | 1.59         | <b>1.41</b>  | 1.42        | 2.57       | 3.00       |
|                                                | Single-copy genes (%) | 75.91     | 38.23       | 81.40        | <b>84.25</b> | 83.47       | 11.92      | 25.83      |
|                                                | Duplicated genes (%)  | 0.01      | 0.01        | <b>0.04</b>  | 0.01         | <b>0.01</b> | <b>0.0</b> | <b>0.0</b> |
| Multi-copy genes (%)                           | 0.0                   | 0.0       | <b>2.08</b> | 0.0          | <b>2.08</b>  | 0.0         | 0.0        |            |
| CPU time (h)                                   | 4.5                   | 1157.5    | 22.4        | 6.0          | 9.5          | <b>0.6</b>  | 19.8       |            |
| Memory (GB)                                    | <b>9.6</b>            | 10.6      | 87.9        | 21.7         | 30.5         | 21.6        | 15.8       |            |
| <i>A. thaliana</i><br>Ler-0<br>PacBio CLR ~90x | Genome fraction (%)   | 99.60     | 99.07       | <b>99.69</b> | 99.30        | 99.62       | 22.48      | 99.28      |
|                                                | No. of contigs        | <b>74</b> | 591         | <b>174</b>   | 155          | 112         | 1508       | 280        |
|                                                | NG50 (Mb)             | 10.8      | 0.7         | <b>14.0</b>  | 8.7          | 6.8         | -          | 12.2       |
|                                                | NGA50 (Mb)            | 6.1       | 0.7         | <b>6.7</b>   | 6.2          | 6.4         | -          | 6.1        |
|                                                | NGA75 (Mb)            | 3.1       | 0.3         | <b>4.5</b>   | 1.8          | 2.3         | -          | 2.7        |
|                                                | No. of misassemblies  | 792       | 1189        | 798          | 611          | 833         | <b>22</b>  | 728        |

|                        |                       |             |              |              |              |             |             |             |
|------------------------|-----------------------|-------------|--------------|--------------|--------------|-------------|-------------|-------------|
|                        | Mismatch fraction (%) | 0.13        | 0.22         | 0.14         | <b>0.11</b>  | 0.17        | 0.37        | 0.18        |
|                        | Indel fraction (%)    | 0.25        | 0.08         | <b>0.02</b>  | 0.23         | 0.58        | 2.12        | 0.28        |
|                        | Single-copy genes (%) | 98.66       | 98.75        | <b>99.89</b> | 98.63        | 96.58       | 8.54        | 99.17       |
|                        | Duplicated genes (%)  | 0.07        | 0.09         | 0.03         | 0.12         | 0.07        | <b>0.0</b>  | 0.02        |
|                        | Multi-copy genes (%)  | 72.58       | <b>93.55</b> | 85.48        | 72.58        | 38.71       | 0.0         | 45.16       |
|                        | CPU time (h)          | 22.9        | 238.9        | 62.2         | 25.6         | 29.1        | <b>0.8</b>  | 43.4        |
|                        | Memory (GB)           | 18.8        | <b>12.2</b>  | 59.7         | 46.7         | 32.7        | 37.4        | 25.7        |
|                        | Genome fraction (%)   | 92.20       | <b>94.33</b> | 93.02        | 92.32        | 88.38       | 71.76       | 91.37       |
|                        | No. of contigs        | <b>148</b>  | 664          | 468          | 219          | 232         | 1852        | 635         |
|                        | NG50 (Mb)             | 6.1         | 4.6          | <b>19.6</b>  | 3.3          | 1.9         | 0.1         | 10.6        |
|                        | NGA50 (Mb)            | 1.4         | 1.2          | <b>1.7</b>   | 1.1          | 1.1         | 0.1         | 1.0         |
|                        | NGA75 (Mb)            | 0.5         | 0.5          | <b>0.6</b>   | 0.4          | 0.3         | -           | 0.3         |
| <i>D. melanogaster</i> | No. of misassemblies  | 1230        | 3167         | 1316         | 1098         | 605         | <b>342</b>  | 1974        |
| ISO1                   | Mismatch fraction (%) | <b>0.16</b> | 0.22         | <b>0.16</b>  | 0.18         | 0.19        | 0.46        | 0.37        |
| ONT ~30x               | Indel fraction (%)    | 0.71        | 0.93         | <b>0.41</b>  | 0.74         | 0.73        | 1.80        | 1.56        |
|                        | Single-copy genes (%) | 98.57       | 98.06        | <b>99.27</b> | 98.22        | 97.86       | 63.43       | 96.08       |
|                        | Duplicated genes (%)  | 0.07        | 0.28         | 0.04         | 0.15         | 0.07        | <b>0.0</b>  | 0.03        |
|                        | Multi-copy genes (%)  | 52.40       | <b>57.21</b> | 56.73        | 47.12        | 21.15       | 0.96        | 3.37        |
|                        | CPU time (h)          | 5.1         | 520.8        | 25.6         | 7.9          | 13.7        | <b>0.6</b>  | 26.9        |
|                        | Memory (GB)           | <b>12.9</b> | 13.1         | 33.4         | 23.4         | 26.7        | 21.5        | 19.2        |
|                        | Genome fraction (%)   | 93.46       | <b>95.97</b> | 92.29        | 93.71        | 90.42       | 91.24       | 92.83       |
|                        | No. of contigs        | <b>121</b>  | 254          | 199          | 299          | 177         | 484         | 311         |
|                        | NG50 (Mb)             | 12.8        | 13.8         | 15.6         | 6.5          | 4.3         | 3.5         | <b>17.0</b> |
|                        | NGA50 (Mb)            | 3.9         | <b>9.4</b>   | 8.3          | 3.2          | 2.6         | 2.7         | 4.5         |
|                        | NGA75 (Mb)            | 1.2         | 2.0          | <b>2.2</b>   | 1.3          | 0.8         | 0.9         | 1.4         |
| <i>D. melanogaster</i> | No. of misassemblies  | 771         | 774          | 609          | 791          | <b>405</b>  | 416         | 761         |
| A4                     | Mismatch fraction (%) | 0.05        | 0.04         | 0.04         | 0.06         | <b>0.03</b> | <b>0.03</b> | 0.17        |
| PacBio CLR ~125x       | Indel fraction (%)    | 0.12        | 0.04         | <b>0.03</b>  | 0.12         | 0.13        | 0.13        | 0.29        |
|                        | Single-copy genes (%) | 99.53       | 99.02        | <b>99.78</b> | 99.18        | 99.16       | 99.20       | 99.55       |
|                        | Duplicated genes (%)  | 0.14        | 0.90         | 0.07         | 0.50         | 0.20        | <b>0.0</b>  | 0.04        |
|                        | Multi-copy genes (%)  | 80.45       | <b>92.74</b> | 83.80        | 86.59        | 80.45       | 29.05       | 59.78       |
|                        | CPU time (h)          | 25.5        | 389.2        | 75.8         | 37.9         | 61.4        | <b>4.3</b>  | 20.5        |
|                        | Memory (GB)           | 22.2        | <b>19.1</b>  | 79.6         | 56.6         | 62.0        | 62.8        | 19.4        |
|                        | Genome fraction (%)   | 92.27       | 92.04        | <b>92.75</b> | 90.61        |             | 91.49       | 87.36       |
|                        | No. of contigs        | <b>249</b>  | 1145         | 1264         | 502          |             | 2989        | 5147        |
|                        | NG50 (Mb)             | 27.9        | 10.6         | <b>31.8</b>  | 9.7          |             | 3.6         | 9.8         |
|                        | NGA50 (Mb)            | 16.0        | 8.1          | <b>19.4</b>  | 8.0          |             | 3.4         | 5.7         |
|                        | NGA75 (Mb)            | 5.9         | 2.9          | <b>8.5</b>   | 3.4          |             | 1.3         | 1.5         |
| <i>H. sapiens</i>      | Mismatch fraction (%) | 0.14        | 0.15         | <b>0.13</b>  | 0.14         |             | 0.15        | 0.24        |
| NA12878                | Indel fraction (%)    | 0.34        | 0.05         | 0.36         | <b>0.25</b>  |             | 0.36        | 0.72        |
| ONT ~45x               | Quality value         | 25.66       | 35.06        | 25.48        | <b>27.00</b> |             | 25.21       | 22.45       |
|                        | Single-copy genes (%) | 90.28       | 94.04        | 90.02        | <b>95.20</b> |             | 70.85       | 58.88       |
|                        | Duplicated genes (%)  | 0.20        | 0.25         | 0.30         | 0.52         |             | <b>0.01</b> | 0.02        |
|                        | Multi-copy genes (%)  | 48.01       | 42.77        | 41.35        | <b>49.14</b> |             | 7.49        | 2.25        |
|                        | Resolved BACs (%)     | 61.18       | 44.73        | 40.08        | <b>63.71</b> |             | 16.46       | 8.86        |
|                        | CPU time (h)          | 470         |              | 1264         | 1373         |             | <b>29</b>   | 1994        |
|                        | Memory (GB)           | <b>83</b>   |              | 730          | 401          |             | 391         | 279         |

**Supplementary Table 3. Raven plant assemblies.** Values in brackets represent best assembly metrics in corresponding publications. *Oryza sativa* assemblies in the original publication were additionally polished with Illumina reads. N50 metric is defined as the length of the contig which coupled with longer contigs covers 50% of the assembly. Complete BUSCOs denote the percentage of single-copy and duplicated orthologs from the *embryophyta* database that are found in the assembly.

| Metric \ Dataset    | <i>Brassica oleracea</i> | <i>Brassica rapa</i> | <i>Musa schizocarpa</i> | <i>Oryza sativa</i><br><i>basmati 334</i> | <i>Oryza sativa</i><br><i>dom sufid</i> |
|---------------------|--------------------------|----------------------|-------------------------|-------------------------------------------|-----------------------------------------|
| Total length (Mb)   | 535.9 (546.4)            | 351.7 (375.3)        | 534.4 (522.0)           | 382.4 (386.6)                             | 380.5 (383.6)                           |
| N50 (Mb)            | 6.4 (7.3)                | 5.5 (3.8)            | 2.5 (2.13)              | 8.1 (6.3)                                 | 11.9 (10.5)                             |
| No. of contigs      | 252 (244)                | 410 (544)            | 546 (615)               | 116 (188)                                 | 107 (116)                               |
| Complete BUSCOs (%) | 74.78 (74.30)            | 85.94 (79.70)        | 47.15 (53.80)           | 92.50 (97.60)                             | 92.19 (97.00)                           |
| CPU time (h)        | 41 (261)                 | 59 (316)             | 95 (246)                | 44 (N/A)                                  | 34 (N/A)                                |

**Supplementary Table 4. Impact on sensitivity and execution time when employing MinHash on top of minimizers.** For overlap Jaccard score calculation new overlaps are declared valid if they cover at least 75% of the old regions on both reads.

|                                          | <i>A. thaliana</i><br>KBS-Mac-75<br>ONT ~30x | <i>D. melanogaster</i><br>ISO1<br>ONT ~30x | <i>A. thaliana</i><br>Ler-0<br>PacBio CLR ~90x | <i>D. melanogaster</i><br>A4<br>PacBio CLR ~125x |
|------------------------------------------|----------------------------------------------|--------------------------------------------|------------------------------------------------|--------------------------------------------------|
| No. of overlaps - minimizers             | 33639084                                     | 38522454                                   | 250456231                                      | 376494493                                        |
| No. of overlaps - minimizers and MinHash | 8724876                                      | 15282409                                   | 26442472                                       | 153956450                                        |
| Overlap Jaccard score                    | 0.208                                        | 0.238                                      | 0.057                                          | 0.266                                            |
| Containment Jaccard score                | 0.800                                        | 0.835                                      | 0.698                                          | 0.864                                            |
| Speedup                                  | 4.42                                         | 3.62                                       | 4.21                                           | 4.01                                             |

**Supplementary Table 5. Impact of overlap parameters on Raven's performance on PacBio HiFi data.** The value pairs in brackets represent the k-mer length and the sampling window length. Number of misassemblies for HG002 and HG00733 datasets were removed due to differences between the samples and the reference genome. Dataset HG002 does not have available BAC clones. NG50 metric is defined as the length of the contig which coupled with longer contigs covers 50% of the reference genome. NGA50 is an extension which is calculated on top of alignments between contigs and the reference. Quality value denotes the Phred base error rate of the assembly obtained by comparing k-mers between short accurate reads and the assembly. Multi-copy genes are those that occur multiple times both in the reference and the assembly. 99.5% of bases of a BAC need to be present in the assembly for it to be resolved.

| Metric                | <i>H. sapiens</i><br>CHM13<br>PacBio HiFi ~35x |              | <i>H. sapiens</i><br>HG002<br>PacBio HiFi ~35x |              | <i>H. sapiens</i><br>HG00733<br>PacBio HiFi ~35x |              |
|-----------------------|------------------------------------------------|--------------|------------------------------------------------|--------------|--------------------------------------------------|--------------|
|                       | Raven (15,5)                                   | Raven (29,9) | Raven (15,5)                                   | Raven (29,9) | Raven (15,5)                                     | Raven (29,9) |
| Genome fraction (%)   | 91.49                                          | 92.55        | 91.20                                          | 92.14        | 91.14                                            | 91.96        |
| No. of contigs        | 5689                                           | 1755         | 7282                                           | 2375         | 7615                                             | 2176         |
| NG50 (Mb)             | 1.1                                            | 12.0         | 0.8                                            | 6.5          | 0.8                                              | 7.1          |
| NGA50 (Mb)            | 0.8                                            | 10.4         | 0.6                                            | 5.9          | 0.6                                              | 6.1          |
| NGA75 (Mb)            | 0.3                                            | 3.7          | 0.2                                            | 2.1          | 0.2                                              | 2.2          |
| No. of misassemblies  | 3803                                           | 2921         |                                                |              |                                                  |              |
| Mismatch fraction (%) | 0.04                                           | 0.06         | 0.15                                           | 0.18         | 0.14                                             | 0.16         |
| Indel fraction (%)    | 0.01                                           | 0.01         | 0.03                                           | 0.04         | 0.03                                             | 0.03         |
| Quality value         | 43.52                                          | 43.51        | 41.94                                          | 42.27        | 39.66                                            | 40.06        |
| Single-copy genes (%) | 95.01                                          | 98.29        | 93.97                                          | 97.57        | 94.17                                            | 97.58        |
| Duplicated genes (%)  | 1.91                                           | 0.39         | 1.82                                           | 0.48         | 1.60                                             | 0.49         |
| Multi-copy genes (%)  | 42.10                                          | 44.64        | 36.93                                          | 38.73        | 33.26                                            | 37.15        |
| Resolved BACs (%)     | 28.59                                          | 39.10        |                                                |              | 18.42                                            | 22.11        |
| CPU time (h)          | 1313                                           | 554          | 3449                                           | 527          | 1300                                             | 486          |
| Memory (GB)           | 87                                             | 65           | 91                                             | 67           | 97                                               | 70           |
